# Supplementary material for: Tunable surface plasmon resonance and enhanced electrical conductivity of In doped ZnO colloidal nanocrystals
Source: Royal Society of Chemistry journal article supplement (doi:10.1039/c3nr05608b), 2014-01-01
Supplement: c3nr05608b1.pdf [file c3nr05608b1.pdf]

**Electronic Supplementary Information :**

**Tunable surface plasmon resonance and enhanced electrical conductivity of In doped ZnO colloidal nanocrystals**

**Sirshendu Ghosh, Manas Saha and S. K. De<sup>\*</sup>**

Department of Material Science, Indian Association for the Cultivation of Science, Kolkata-700032, India. \*Corresponding author. Phone: +91-33-2473-3073. E-mail: [msskd@iacs.res.in](mailto:msskd@iacs.res.in).

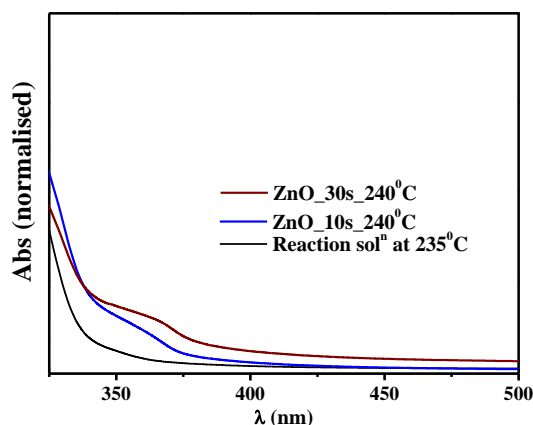

**Fig. S1:** Appearance of band gap absorbance after 10 secs of reaction

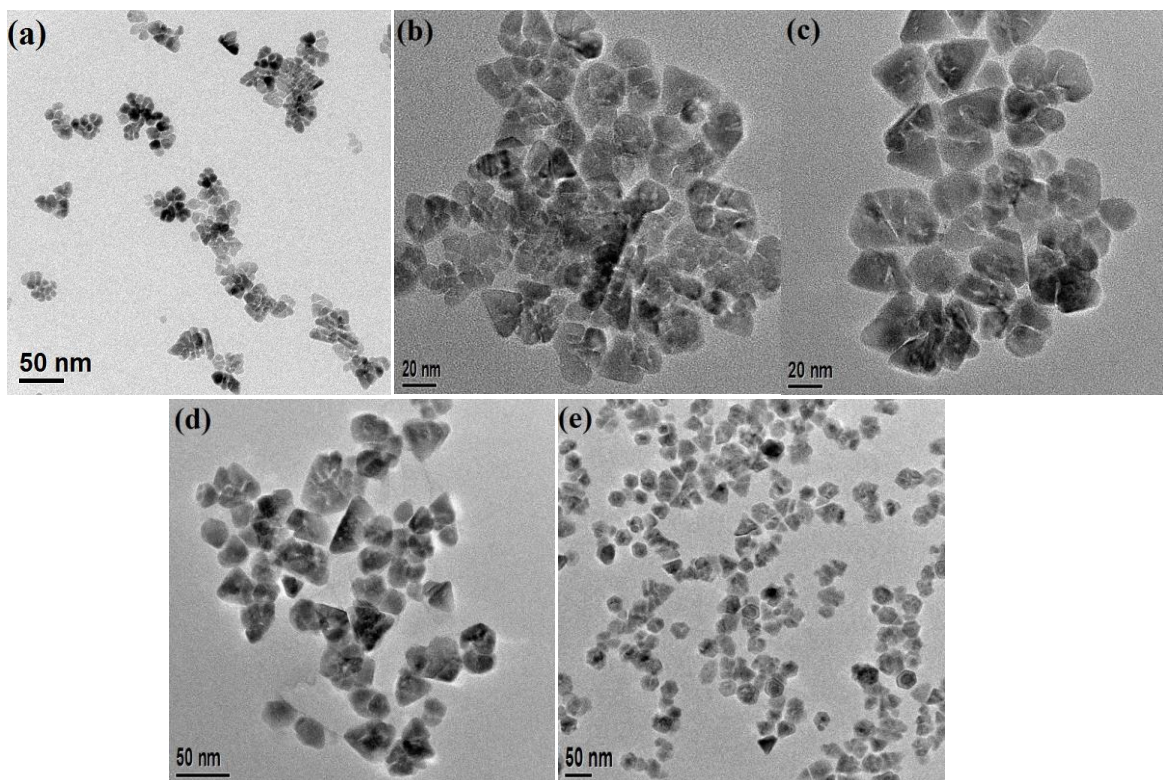

**Fig. S2:** Temporal growth evolution of ZnO NCs from  $\text{Zn}(\text{acac})_2$  synthesized at 240 °C; TEM images at different time (a) 10 s, (b) 1 min, (c) 10 min, (d) 15 min, (e) 30 min.

Fig. S3a shows FT-IR spectrum of OLAH,  $\text{Zn}(\text{acac})_2$  and mixture of OLAH and  $\text{Zn}(\text{acac})_2$  heated at  $90^\circ\text{C}$  in vacuum. The FTIR peaks appear at  $1578$  and  $1517\text{ cm}^{-1}$  in  $\text{Zn}(\text{acac})_2$  due to the symmetric and antisymmetric COCC stretching vibration of acetylacetonate ligand<sup>1</sup> and the stretching frequency for carbonyl group of oleic acid is found at  $1711\text{ cm}^{-1}$ . After 15 min of reaction at vacuum the intermediate zinc complex shows a stretching band at  $1536\text{ cm}^{-1}$  corresponding to COCC group of  $\text{acac}^-$  ligand ( $19\text{ cm}^{-1}$  up field compare to pure one)<sup>1</sup>, whereas the carbonyl stretching band for oleate group appears at  $1550\text{ cm}^{-1}$  along with the presence of Stretching band for free oleic acid at  $1711\text{ cm}^{-1}$ . More than 30 minute of heating at  $90^\circ\text{C}$  under vacuum, results in the formation of  $\text{Zn}(\text{OLA})_2$  complex with total consumption of oleic acid (diminution of peak at  $1711\text{ cm}^{-1}$ ). FTIR spectra of  $\text{Zn}(\text{OLA})_2$  complex dissolved in ODE (Fig. S4) shows a bidentate binding of oleate ( $\Delta\nu_{\text{as-s}} = 149\text{ cm}^{-1}$ , where  $\nu_{\text{as}} = 1555\text{ cm}^{-1}$  and  $\nu_{\text{s}} = 1406\text{ cm}^{-1}$ ) but in the intermediate complex (Fig. S3a), probably the free neutral oleic acid increases the bridging contact between  $\text{Zn}(\text{acac})_{2-x}(\text{OLA})_x$  units, which yields a downfield shift (from  $1555$  to  $1550\text{ cm}^{-1}$ ) of oleate ligand.<sup>2</sup>

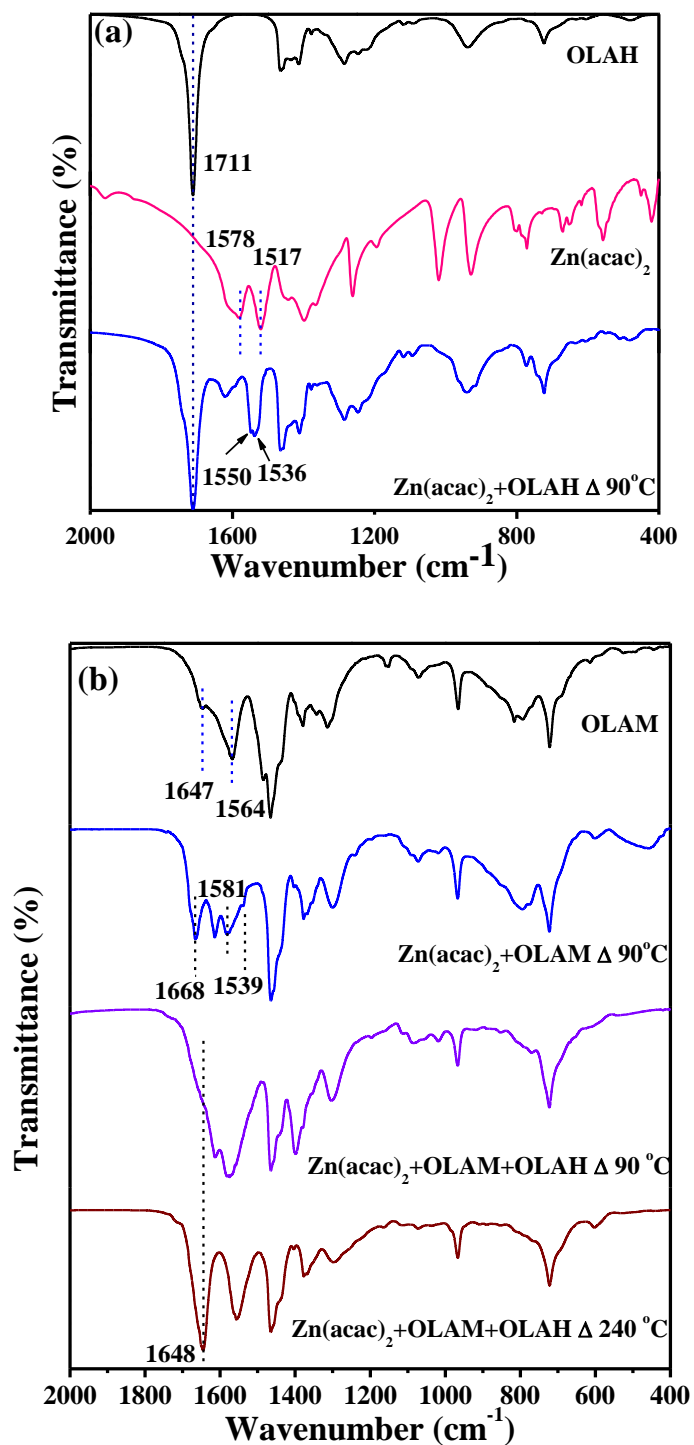

**Fig. S3**

**Fig. S3:** (a) FTIR spectra of OLAH, Zn(acac)<sub>2</sub> and mixture of OLAH and Zn(acac)<sub>2</sub> heated at 90 °C. (b) FTIR spectra of OLAM, mixture of OLAM and Zn(acac)<sub>2</sub> heated at 90 °C, mixture of OLAH, OLAM and Zn(acac)<sub>2</sub> heated at 90 °C and 240 °C respectively. Formation of amide at nucleation temperature.

By FTIR spectroscopy (Fig. S3b) it was very clear that amide (-CO-NH-, 1649 cm<sup>-1</sup> for stretching vibration of CO) was a by-product of the NC growth reaction.

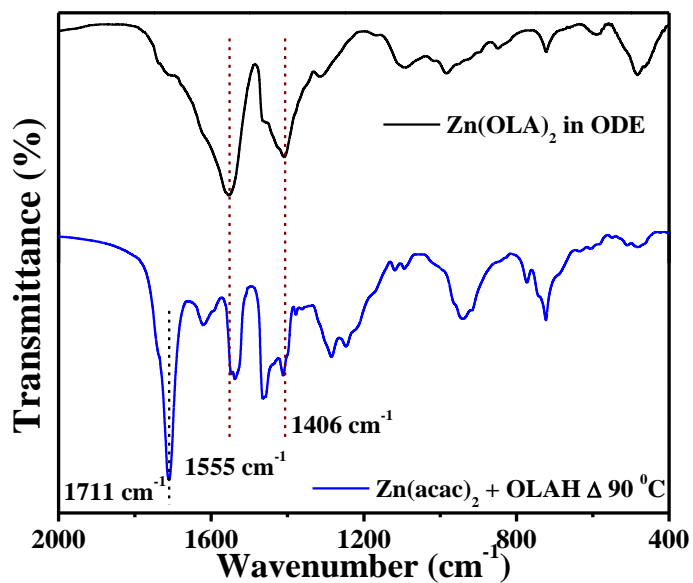

**Fig. S4**

Fig. S4 shows the FTIR spectra of Zn(OLA)<sub>2</sub> and the mixture of Zn(acac)<sub>2</sub> and OLAH heated at 90 °C in vacuum. It shows the presence of free OLAH in mixture and downfield shifting of antisymmetric stretching band from 1555 cm<sup>-1</sup> to 1550 cm<sup>-1</sup> also confirms the bridging interaction between Zn(acac)<sub>2-x</sub>(OLA)<sub>x</sub> units.

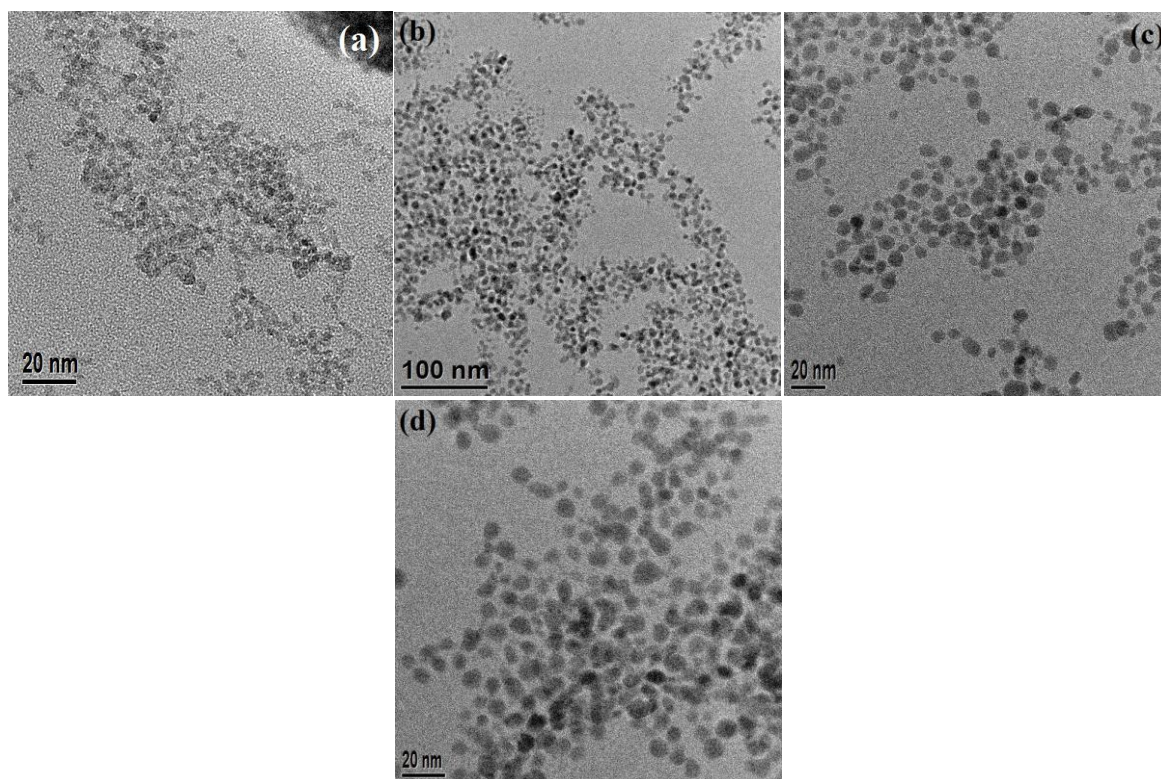

**Fig. S5:** Temporal growth evolution InO NCs from  $\text{In}(\text{acac})_3$  derived precursor where the reaction was carried out at 240 °C; TEM images at different time interval (a) 10s, (b) 1 min, (c) 10 min, (d) 30 min.



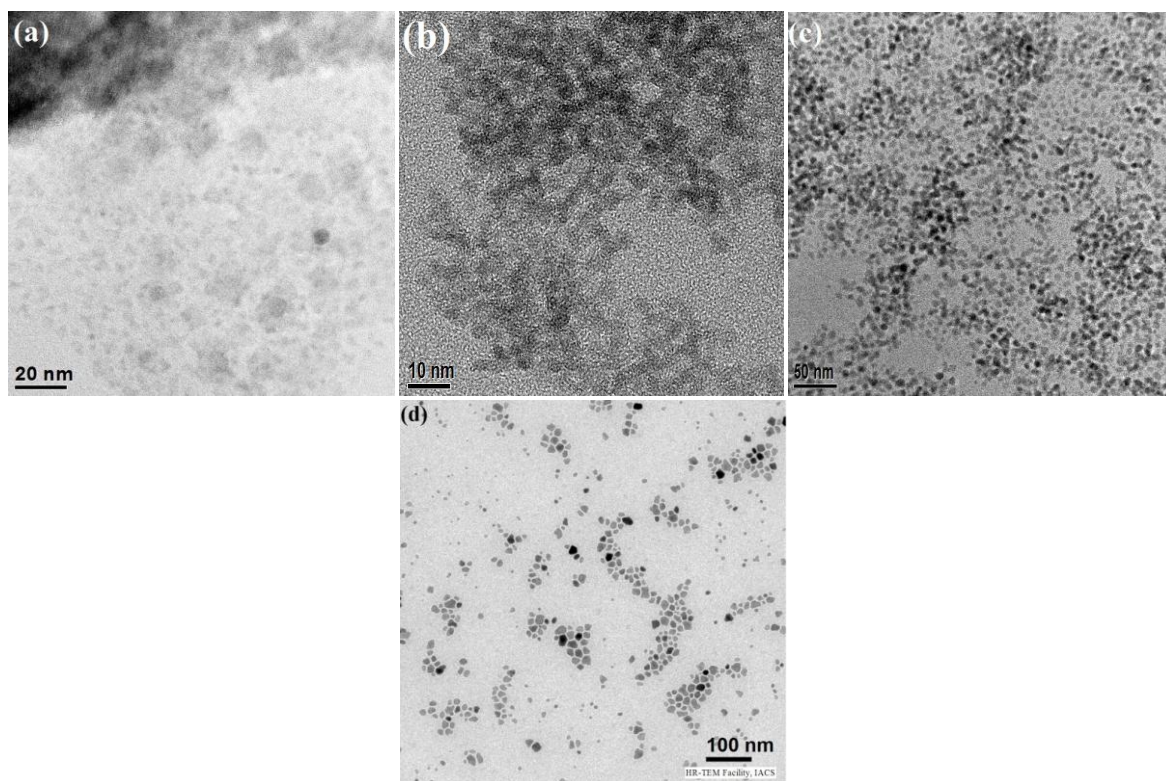

**Fig. S6:** Temporal growth evolution of In<sub>2</sub>O<sub>3</sub> NCs from In(OAc)<sub>3</sub> derived precursor where the reaction was carried out at 290 °C; TEM images of product at different time interval (a) 10s, (b) 1 min, (c) 5 min and (d) 30min.

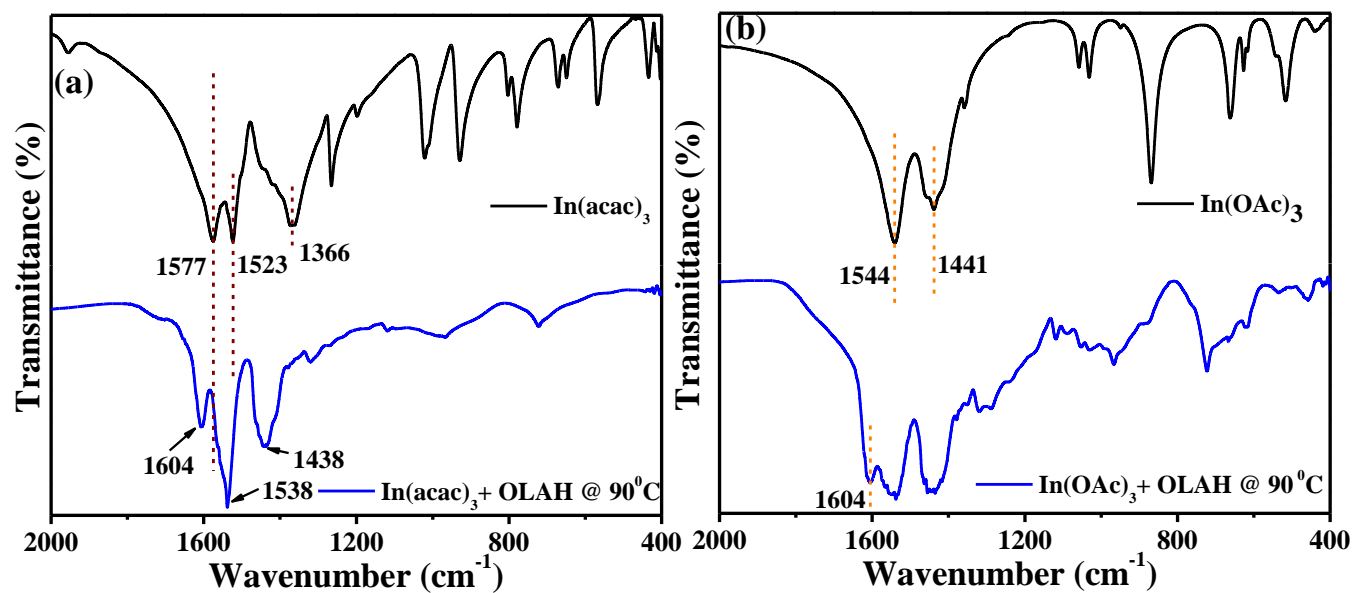

**Fig. S7:** Formation of In intermediate complex, Total consumption of 2 mmol of OLAH by both  $\text{In}(\text{acac})_3$  and  $\text{In}(\text{OAc})_3$  results formation of  $\text{In}(\text{acac})(\text{OLA})_2$  and  $\text{In}(\text{OAc})(\text{OLA})_2$ .



Fig. S8(a) shows the Rietveld fitting of sample ZnO, ZnIn<sub>2</sub> and ZnIn<sub>4</sub>. Whereas Fig. S8(b) shows unit cell volume expansion with increase in In<sup>3+</sup> concentration.

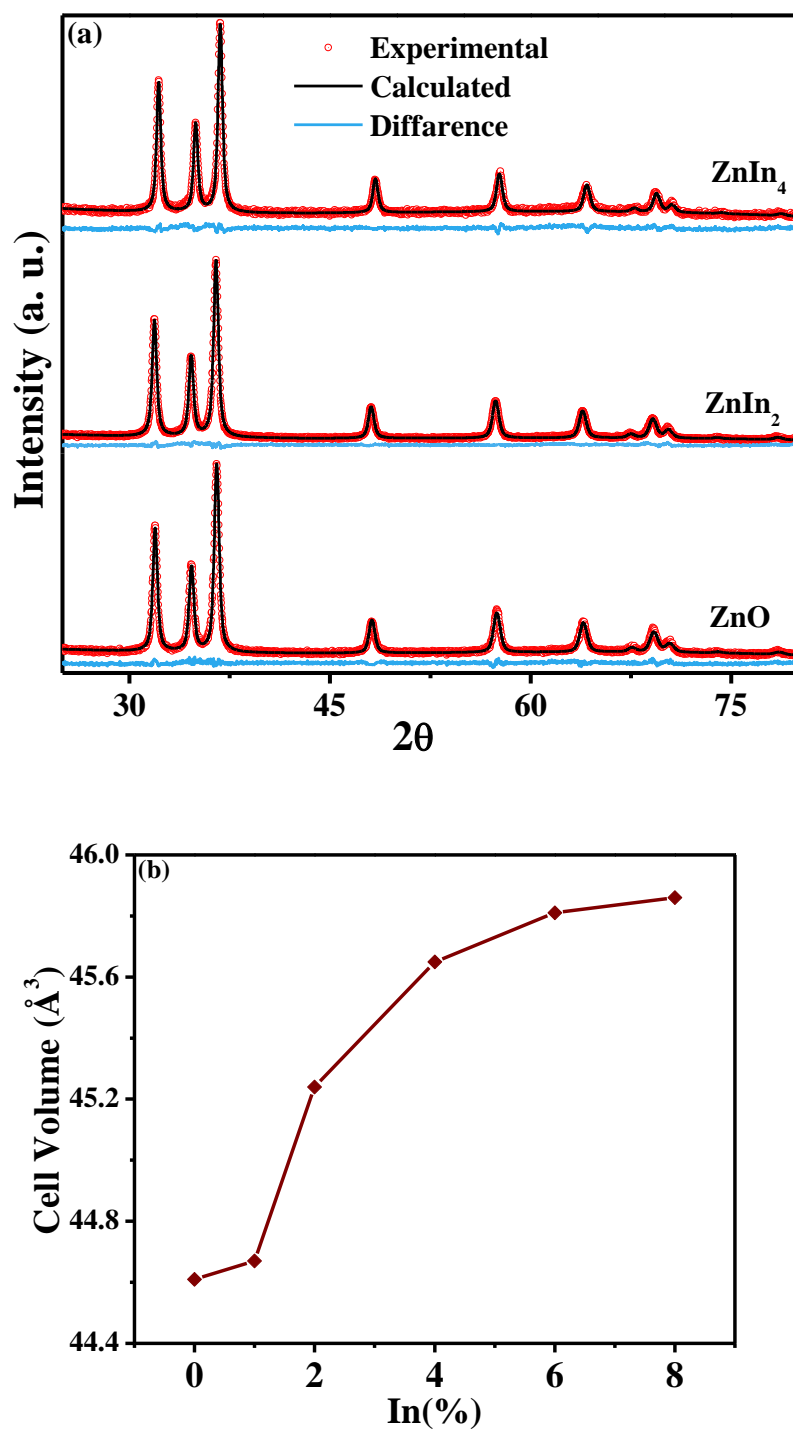

Fig. S8

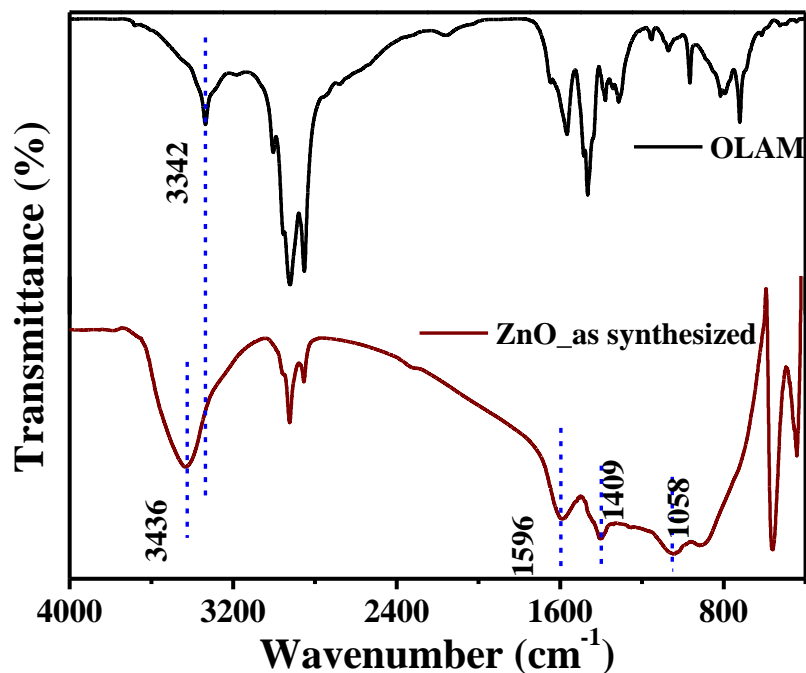

**Fig. S9:** shows FTIR spectra of as-synthesized ZnO nanocrystals which confirms the nanocrystals surface was well protected by OLAM.

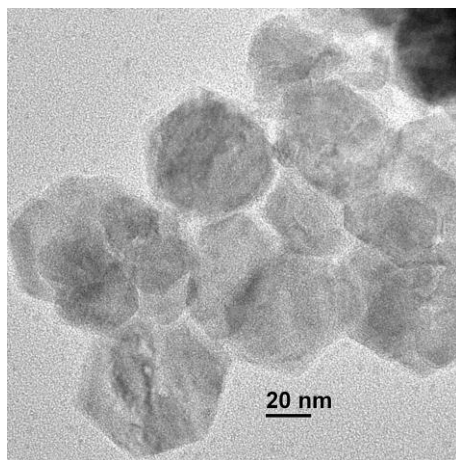

**Fig. S10:** Formation of irregular shaped ZnO nanocrystals upon addition of OLAM at  $\sim 240^\circ\text{C}$ . Inhomogeneous crystal growth was observed as OLAM acts as only the capping agent and not participated in complex formation.

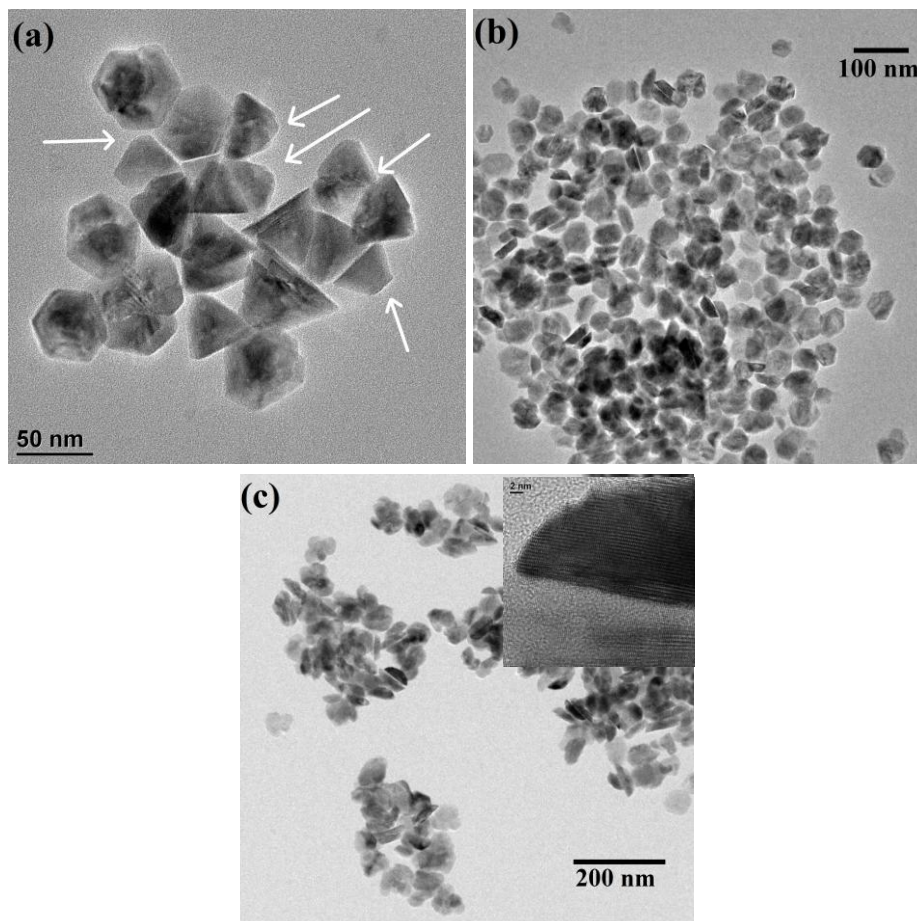

**Fig. S11:** (a), (b) and (c) represents the TEM images of  $\text{ZnIn}_2$ ,  $\text{ZnIn}_4$  and  $\text{ZnIn}_6$  nanocrystals respectively. The TEM images clearly indicates the decrease of pyramid height and lesser exposure of  $\{10\bar{1}1\}$  surface. Inset of Fig. S11(c) is HRTEM image of  $\text{ZnIn}_6$  samples.

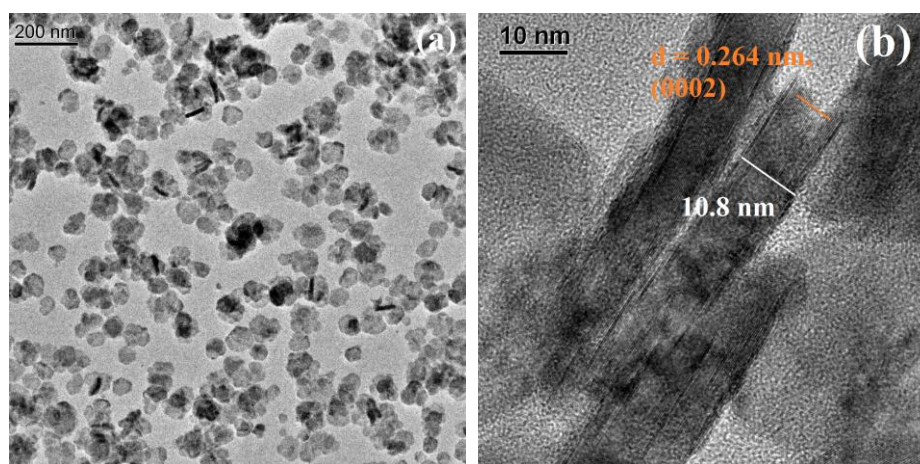

**Fig. S12**

Fig. S12(a) depicts the TEM image of  $\text{ZnIn}_8$  nanocrystals. Fig. S12(b) shows the lateral stacking of few hexagonal platelets. The measured thickness for each platelet is found to be  $\sim 11$  nm and the growth plane is (0002).

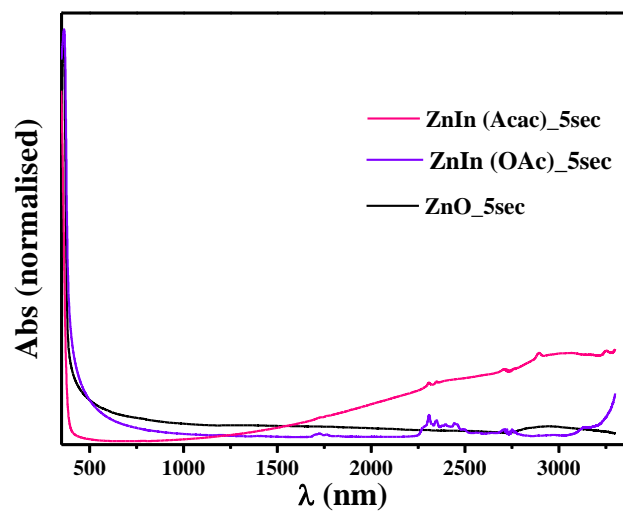

**Fig. S13:** Appearance of SPR just at 5 sec of reaction when the In-source was  $\text{In}(\text{acac})_3$

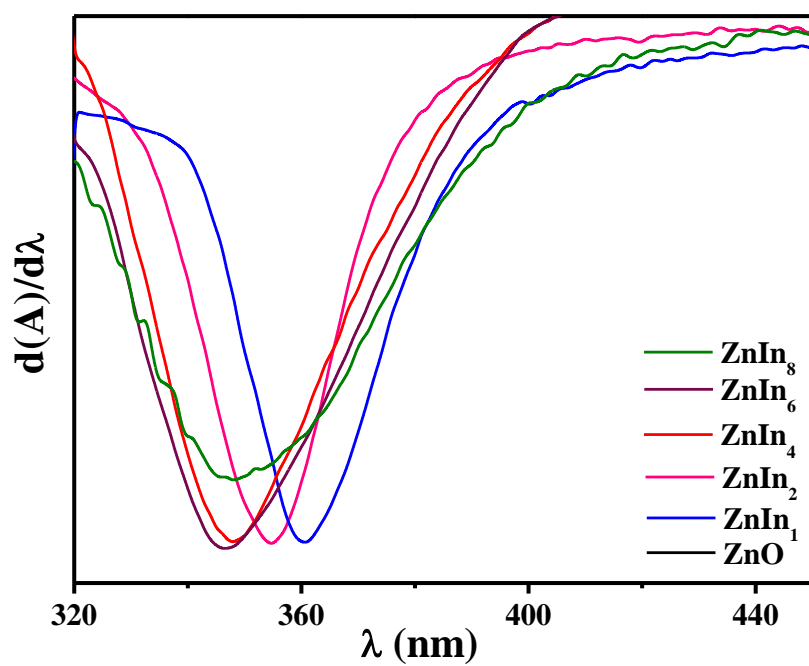

**Fig. S14**

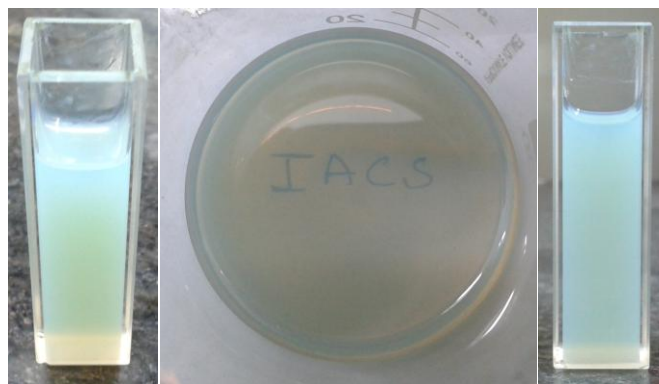

**Fig. S15:** Digital photographs of  $\text{ZnIn}_6$  colloids solution in hexane.

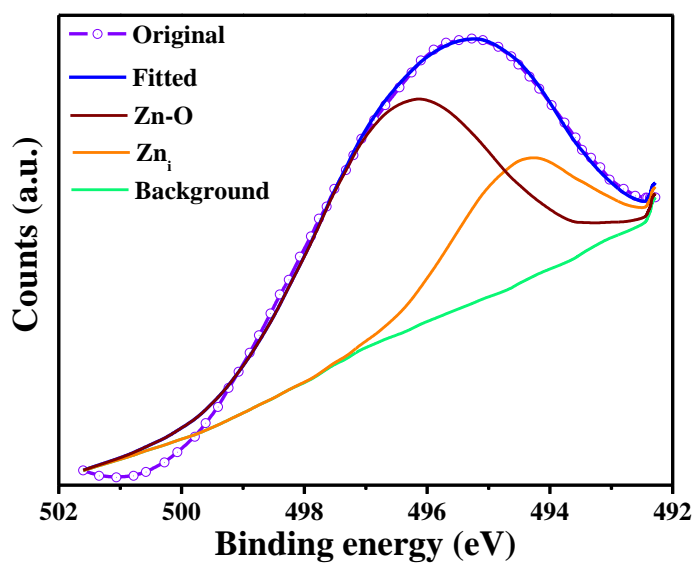

**Fig. S16:** Fitted Auger peak of  $\text{Zn } L_3M_{4,5}M_{4,5}$  spectrum of  $\text{ZnIn}_4$  NC.

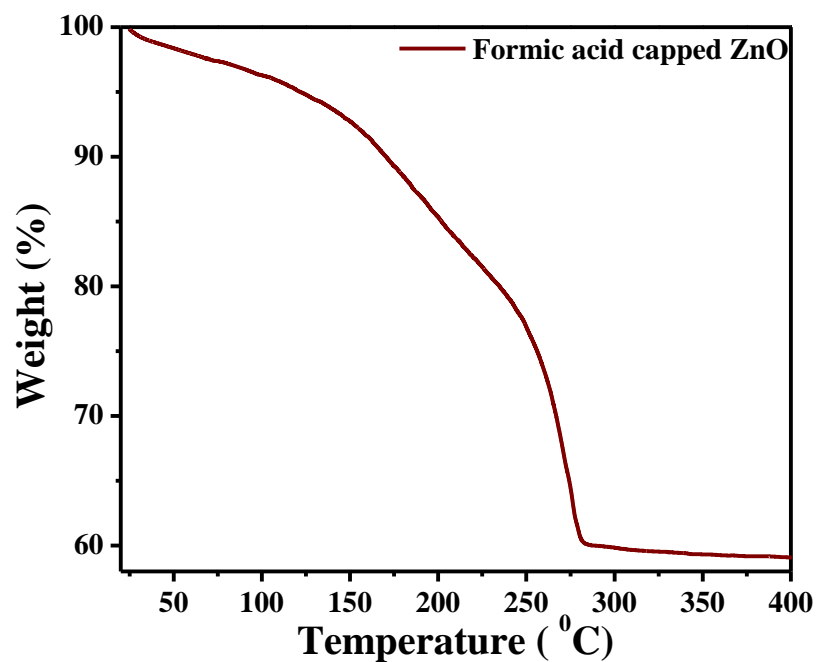

**Fig. S17:** TGA plot of formic acid capped ZnO nanocrystals shows a sharp decrease in weight % at 250 °C to 280 °C.

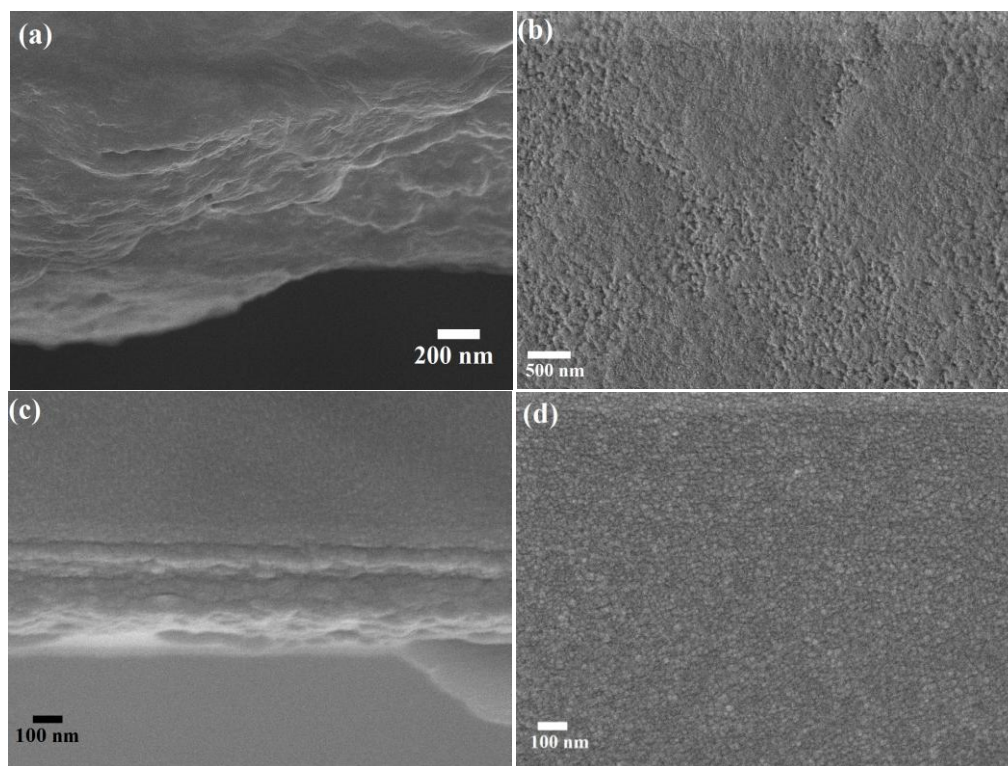

**Fig. S18:** The cross-section view and top view of as-deposited film of ZnIn<sub>4</sub> NC and ligand exchanged film are presented by (a), (b) and (c),(d) respectively.



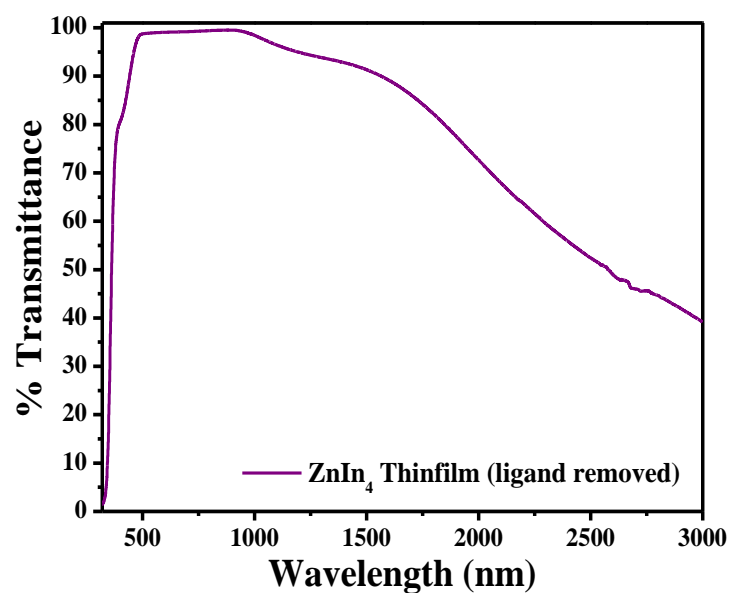

**Fig. S19:** The ligand stripped film of ZnIn<sub>4</sub> NC shows ~ 90 to 95% transmittance in visible range keeping the plasmonic absorption at NIR intact.

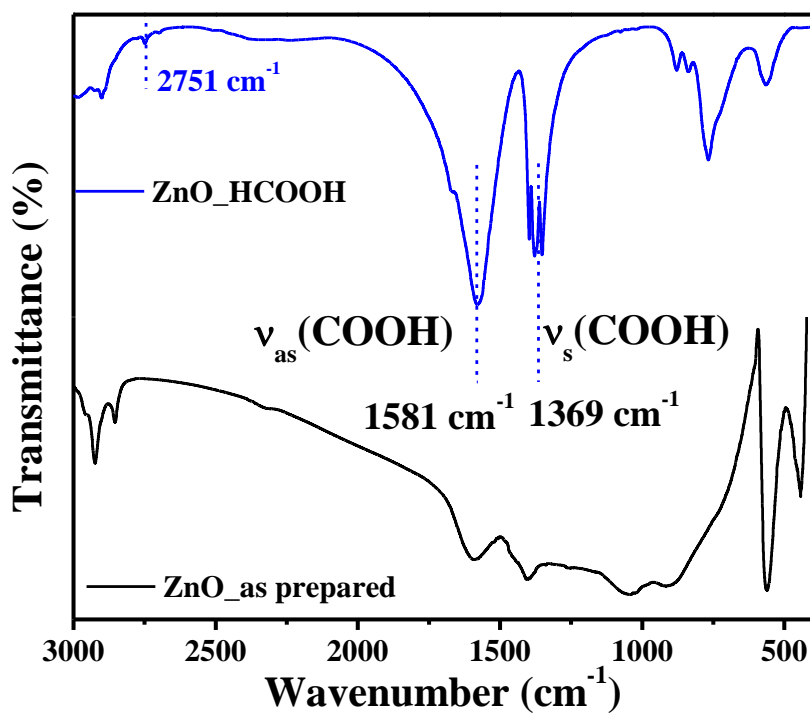

**Fig. S20:** FTIR spectra of as-synthesized ZnO NC and fomic acid capped ZnO NCs.

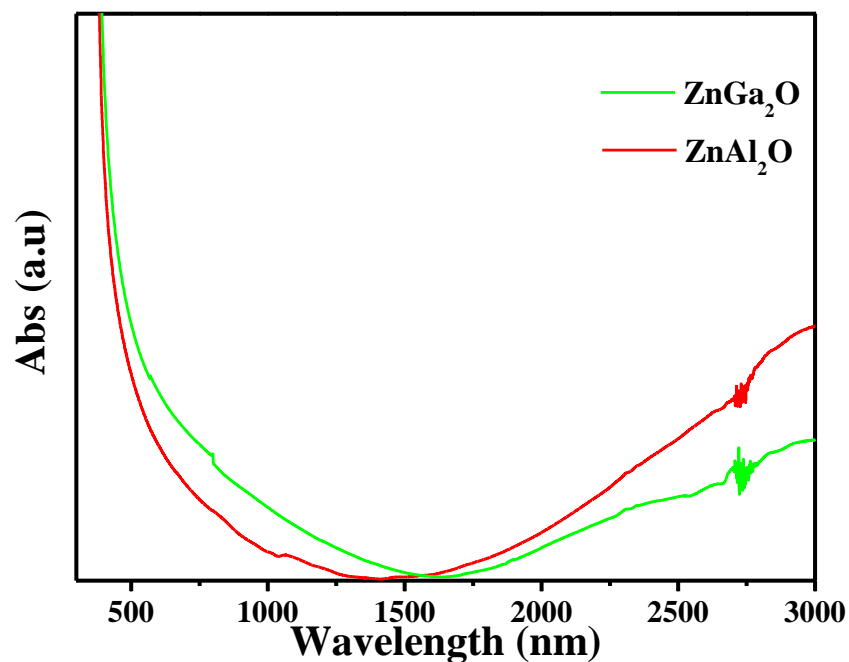

**Fig. S21:** NIR absorbance of 2 mole% Al and Ga doped ZnO NCs.

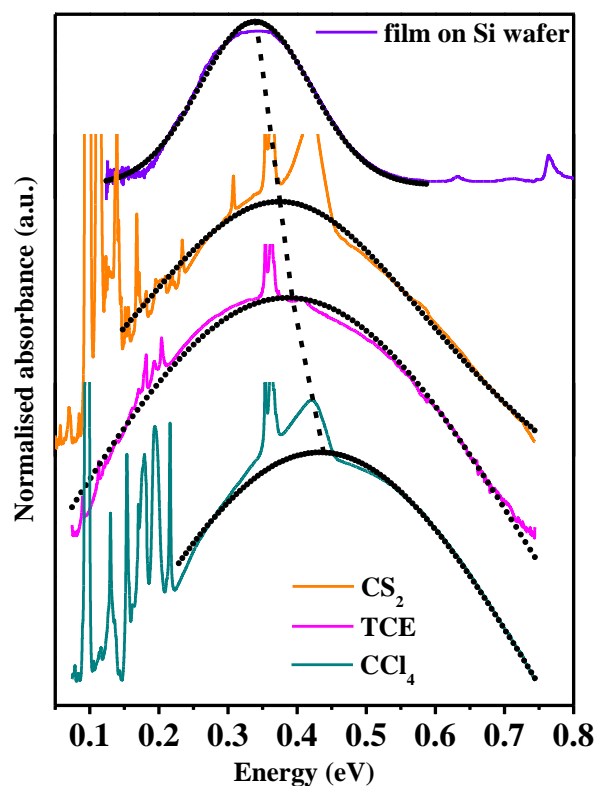

**Fig.S22:** NIR absorbance spectra for colloidal dispersions of ZnIn<sub>6</sub> NCs in different solvent and thin film on Si-wafer. Refractive index for CCl<sub>4</sub>, TCE and CS<sub>2</sub> are 1.46, 1.51 and 1.62 respectively. The black dashed lines are the respective best fits of the plasmon peaks.

**References:**

- (1) Bahers, T. L.; Pauporté, T.; Labat, F.; Lefevre, G.; Ciofini, I. *Langmuir* **2011**, 27, 3442–3450.
- (2) Zhang, H.; Ha, D-H.; Hovden, R.; Kourkoutis, L. F.; Robinson, R. D. *Nano Lett* **2011**, 11, 188–197.
